# Supplementary material for: "Orthopedic injuries in Yemen civil war: a retrospective study of incidence, management, and outcomes".
Source: Research Square preprint supplement (doi:10.21203/rs.3.rs-2982701/v1), 2023-05-30
Supplement: Supplementary file 1 [file 8ee0cdd36cfced56e5a563b3.pdf]

Table 1: Demographic characteristics of patients with orthopedic injuries

| Variable    | Frequency | Percentage |
|-------------|-----------|------------|
| Sex         |           |            |
| Male        | 2042      | 67         |
| Female      | 1008      | 33         |
| Age group   |           |            |
| <18 years   | 612       | 20         |
| 18–40 years | 1836      | 60         |

*40 years |602|20 Status | | Civilian |2440|80  
 Combatant |610|20*

| Variable                   | Frequency | Percentage |
|----------------------------|-----------|------------|
| Injury type                |           |            |
| Fracture                   | 2684      | 88         |
| Dislocation                | 306       | 10         |
| Ligament/ten<br>don injury | 60        | 2          |
| Fracture<br>location       |           |            |
| Femur                      | 938       | 35         |
| Tibia                      | 804       | 30         |
| Humerus                    | 486       | 18         |
| Radius/ulna                | 366       | 14         |
| Foot/ankle                 | 90        | 3          |
| Fracture type              |           |            |
| Open                       | 2442      | 91         |
| Closed                     | 242       | 9          |

| Cause     | Frequency | Percentage |
|-----------|-----------|------------|
| Explosion | 2130      | 70%        |
| Gunshot   | 690       | 23%        |
| Fall      | 120       | 4%         |
| Other     | 110       | 4%         |

Table 4: Treatment methods for orthopedic injuries among patients

| <b>Variable</b>        | <b>Frequency</b> | <b>Percentage</b> |
|------------------------|------------------|-------------------|
| Treatment method       |                  |                   |
| Surgery                | 2592             | 85                |
| Non-surgery            | 458              | 15                |
| Surgical procedure     |                  |                   |
| External fixation      | 1555             | 60                |
| ORIF                   | 777              | 30                |
| Amputation             | 260              | 10                |
| Non-surgical procedure |                  |                   |
| Casting                | 153              | 10                |
| Traction               | 46               | 3                 |
| Splinting              | 31               | 2                 |

Table 5: Treatment times for orthopedic injuries among patients

| <b>Variable</b>                                 | <b>Mean</b> | <b>Range</b> |
|-------------------------------------------------|-------------|--------------|
| Time from injury to hospital admission (hours)  | 12          | 1–72         |
| Time from hospital admission to surgery (hours) | 24          | 2–96         |
| Time from surgery to discharge (days)           | 30          | 5–90         |

Table 6: Outcomes of orthopedic injuries among patients

| <b>Variable</b>                  | <b>Frequency</b> | <b>Percentage</b> |
|----------------------------------|------------------|-------------------|
| Death                            | 213              | 7                 |
| Soft-tissue/neurovascular injury | 2867             | 94                |
| Surgical complication            | 612              | 20                |
| Nonunion                         | 122              | 4                 |
| Malunion                         | 61               | 2                 |
| Nerve injury                     | 61               | 2                 |
